# Supplementary material for: A local proton source from carboxylic acid functionalized metal porphyrins for enhanced electrocatalytic CO2 reduction
Source: Royal Society of Chemistry journal article supplement (doi:10.1039/d0nj02900a), 2020-01-01
Supplement: d0nj02900a1.pdf [file d0nj02900a1.pdf]

## Supplementary Information

### **A local proton source from carboxylic acid functionalized metal porphyrins for enhanced electrocatalytic CO<sub>2</sub> reduction**

**Yiwei Zhou,<sup>a</sup> Yunheng Xiao<sup>a</sup> and Jian Zhao\*<sup>a</sup>**

<sup>a</sup> Tianjin Key Laboratory of Organic Solar Cells and Photochemical Conversion, School of Chemistry and Chemical Engineering, Tianjin University of Technology, Tianjin 300384, China.

Corresponding Author

E-mail: [zjtjbd@hotmail.com](mailto:zjtjbd@hotmail.com); [zjtjbd@email.tjut.edu.cn](mailto:zjtjbd@email.tjut.edu.cn)

## Materials.

4,4',4'',4'''-(Porphine-5,10,15,20-tetrayl)tetrakis(benzoic acid) (Dye content, 75%, Sigma-Aldrich LLC), Hematoporphyrin (Carbosynth, Ltd), NaOH (97%, Aladdin), HCl (36%-38%, Yongfei Chemical Reagent Co. Ltd.), ultrapure water (18.2 M  $\Omega$ ·cm). CuCl<sub>2</sub>·H<sub>2</sub>O (98%), FeCl<sub>2</sub> (99.5%), CoCl<sub>2</sub> (98%), and NiCl<sub>2</sub> (98%) were purchased from Sun Chemical Technology (shanghai)Co., Ltd. All chemicals were used as received without further purification.

## Preparation details.

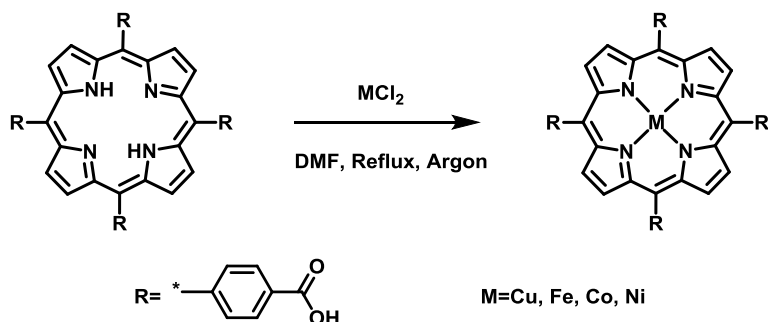

CuTPP\_COOH (Cu<sup>II</sup>AH): 70 ml anhydrous DMF was bubbled with argon for 0.5 h. 0.3103 g CuCl<sub>2</sub>·H<sub>2</sub>O was added and bubbled with argon for another 0.5 h. 0.2609g 4,4',4'',4'''-(Porphine-5,10,15,20-tetrayl)tetrakis(benzoic acid) was added and bubbled for another 1 h. The mixture solution was refluxed at 160-170 °C overnight. After cooling and DMF removal by distillation, the obtained electrocatalysts CuTPP\_COOH were precipitated by adding water. The precipitate was then dissolved in 0.1 M NaOH solution and re-precipitated by adding 1 M HCl solution. Finally, the metal porphyrin was dissolved in ethanol and recrystallized by solvent evaporation (0.278g). UV-vis (DMF):  $\lambda_{\text{max}} = 417 \text{ nm}$  (Soret), 540 nm (Q<sub>1</sub>).

FeTPP\_COOH (Fe<sup>II</sup>AH): 70 ml anhydrous DMF was bubbled with argon for 0.5 h. 0.2307 g FeCl<sub>2</sub> was added and bubbled with argon for another 0.5 h. 0.2609g 4,4',4'',4'''-(Porphine-5,10,15,20-tetrayl)tetrakis(benzoic acid) was added and bubbled for another 1 h. The mixture solution was refluxed at 160-170 °C overnight. After cooling and DMF removal by distillation, the obtained electrocatalysts FeTPP\_COOH were precipitated by adding water. The precipitate was then dissolved in 0.1 M NaOH solution and re-precipitated by adding 1 M HCl solution. Finally, the metal porphyrin was dissolved in ethanol and recrystallized by solvent evaporation (0.32g). UV-vis (DMF):  $\lambda_{\text{max}} = 420 \text{ nm}$  (Soret), 508 nm (Q<sub>1</sub>), 574 nm (Q<sub>2</sub>).

CoTPP\_COOH (Co<sup>II</sup>AH): 70 ml anhydrous DMF was bubbled with argon for 0.5 h. 0.2363 g FeCl<sub>2</sub> was added and bubbled with argon for another 0.5 h. 0.2609g 4,4',4'',4'''-(Porphine-5,10,15,20-tetrayl)tetrakis(benzoic acid) was added and bubbled for another 1 h. The mixture solution was refluxed at 160-170 °C overnight. After cooling and DMF removal by distillation, the obtained electrocatalysts CoTPP\_COOH were precipitated by adding water. The precipitate was then dissolved in 0.1 M NaOH solution and re-precipitated by adding 1 M HCl solution. Finally, the metal porphyrin was dissolved in ethanol and recrystallized by solvent evaporation (0.33g). UV-vis (DMF):  $\lambda_{\text{max}} = 435 \text{ nm}$  (Soret), 550 nm (Q<sub>1</sub>), 590 nm (Q<sub>2</sub>).

NiTPP\_COOH (Ni<sup>II</sup>AH): 70 ml anhydrous DMF was bubbled with argon for 0.5 h. 0.2359 g FeCl<sub>2</sub> was added and bubbled with argon for another 0.5 h. 0.2609g 4,4',4'',4'''-(Porphine-

5,10,15,20-tetra(2-hydroxyethyl)tetraakis(benzoic acid) was added and bubbled for another 1 h. The mixture solution was refluxed at 160-170 °C overnight. After cooling and DMF removal by distillation, the obtained electrocatalysts NiTPP~COOH were precipitated by adding water. The precipitate was then dissolved in 0.1 M NaOH solution and re-precipitated by adding 1 M HCl solution. Finally, the metal porphyrin was dissolved in ethanol and recrystallized by solvent evaporation (0.35g). UV-vis (DMF):  $\lambda_{\text{max}} = 415 \text{ nm}$  (Soret), 526 nm ( $Q_1$ ).

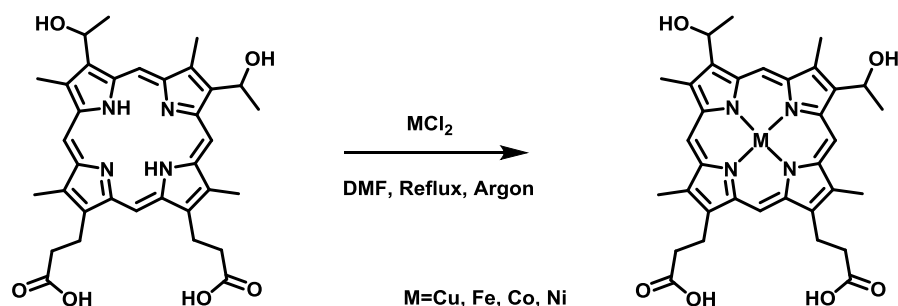

CuTPP~COOH ( $\text{Cu}^{\text{II}}\sim\text{AH}$ ): 70 ml anhydrous DMF was bubbled with argon for 0.5 h. 0.3103 g  $\text{CuCl}_2\cdot\text{H}_2\text{O}$  was added and bubbled with argon for another 0.5 h. 0.1976g hematoporphyrin was added and bubbled for another 1 h. The mixture solution was refluxed at 160-170 °C overnight. After cooling and DMF removal by distillation, the obtained electrocatalysts CuTPP~COOH were precipitated by adding water. The precipitate was then dissolved in 0.1 M NaOH solution and re-precipitated by adding 1 M HCl solution. Finally, the metal porphyrin was dissolved in ethanol and recrystallized by solvent evaporation (0.265g). UV-vis (DMF):  $\lambda_{\text{max}} = 406 \text{ nm}$  (Soret), 535 nm ( $Q_1$ ), 573 nm ( $Q_2$ ).

FeTPP~COOH ( $\text{Fe}^{\text{II}}\sim\text{AH}$ ): 70 ml anhydrous DMF was bubbled with argon for 0.5 h. 0.2307 g  $\text{FeCl}_2$  was added and bubbled with argon for another 0.5 h. 0.1976g hematoporphyrin was added and bubbled for another 1 h. The mixture solution was refluxed at 160-170 °C overnight. After cooling and DMF removal by distillation, the obtained electrocatalysts FeTPP~COOH were precipitated by adding water. The precipitate was then dissolved in 0.1 M NaOH solution and re-precipitated by adding 1 M HCl solution. Finally, the metal porphyrin was dissolved in ethanol and recrystallized by solvent evaporation (0.3g). UV-vis (DMF):  $\lambda_{\text{max}} = 382 \text{ nm}$  (Soret), 508 nm ( $Q_1$ ), 542 nm ( $Q_2$ ).

CoTPP~COOH ( $\text{Co}^{\text{II}}\sim\text{AH}$ ): 70 ml anhydrous DMF was bubbled with argon for 0.5 h. 0.2363 g  $\text{FeCl}_2$  was added and bubbled with argon for another 0.5 h. 0.1976g hematoporphyrin was added and bubbled for another 1 h. The mixture solution was refluxed at 160-170 °C overnight. After cooling and DMF removal by distillation, the obtained electrocatalysts CoTPP~COOH were precipitated by adding water. The precipitate was then dissolved in 0.1 M NaOH solution and re-precipitated by adding 1 M HCl solution. Finally, the metal porphyrin was dissolved in ethanol and recrystallized by solvent evaporation (0.25g). UV-vis (DMF):  $\lambda_{\text{max}} = 421 \text{ nm}$  (Soret), 537 nm ( $Q_1$ ), 572 nm ( $Q_2$ ).

NiTPP~COOH ( $\text{Ni}^{\text{II}}\sim\text{AH}$ ): 70 ml anhydrous DMF was bubbled with argon for 0.5 h. 0.2359 g  $\text{FeCl}_2$  was added and bubbled with argon for another 0.5 h. 0.1976g hematoporphyrin was added and bubbled for another 1 h. The mixture solution was refluxed at 160-170 °C overnight. After cooling and DMF removal by distillation, the obtained electrocatalysts NiTPP~COOH were precipitated by adding water. The precipitate was then dissolved in 0.1 M NaOH solution and re-precipitated by adding 1 M HCl solution. Finally, the metal porphyrin was dissolved in ethanol and recrystallized by solvent evaporation (0.28g). UV-vis (DMF):  $\lambda_{\text{max}} = 396 \text{ nm}$  (Soret), 522 nm ( $Q_1$ ), 559 nm ( $Q_2$ ).

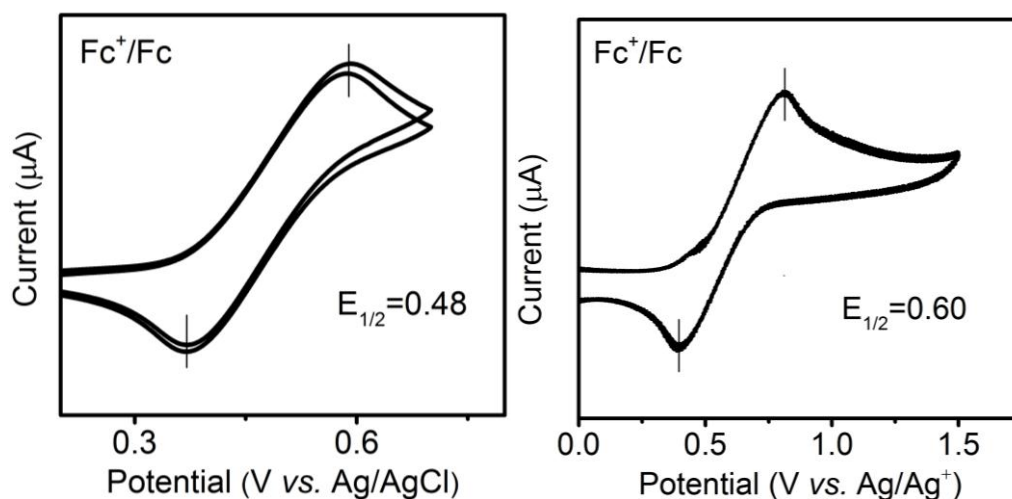

**Figure S1.** CV curves of  $\text{Fc}^+/\text{Fc}$  in anhydrous DMF (0.1 M TBATFB) at 100 mV/s with different reference electrodes.

According to Figure S1, +1.0 V to -2.0 V vs. Ag/AgCl for the cyclic voltammetry (CV) test is calculated to be +1.48 V to -1.52 V vs.  $\text{Fc}^+/\text{Fc}$ .

According to Figure S1, -1.8 V to -2.3 V vs. Ag/Ag<sup>+</sup> for the electrocatalytic CO<sub>2</sub> test is calculated to be -1.2 V to -1.7 V vs.  $\text{Fc}^+/\text{Fc}$ .

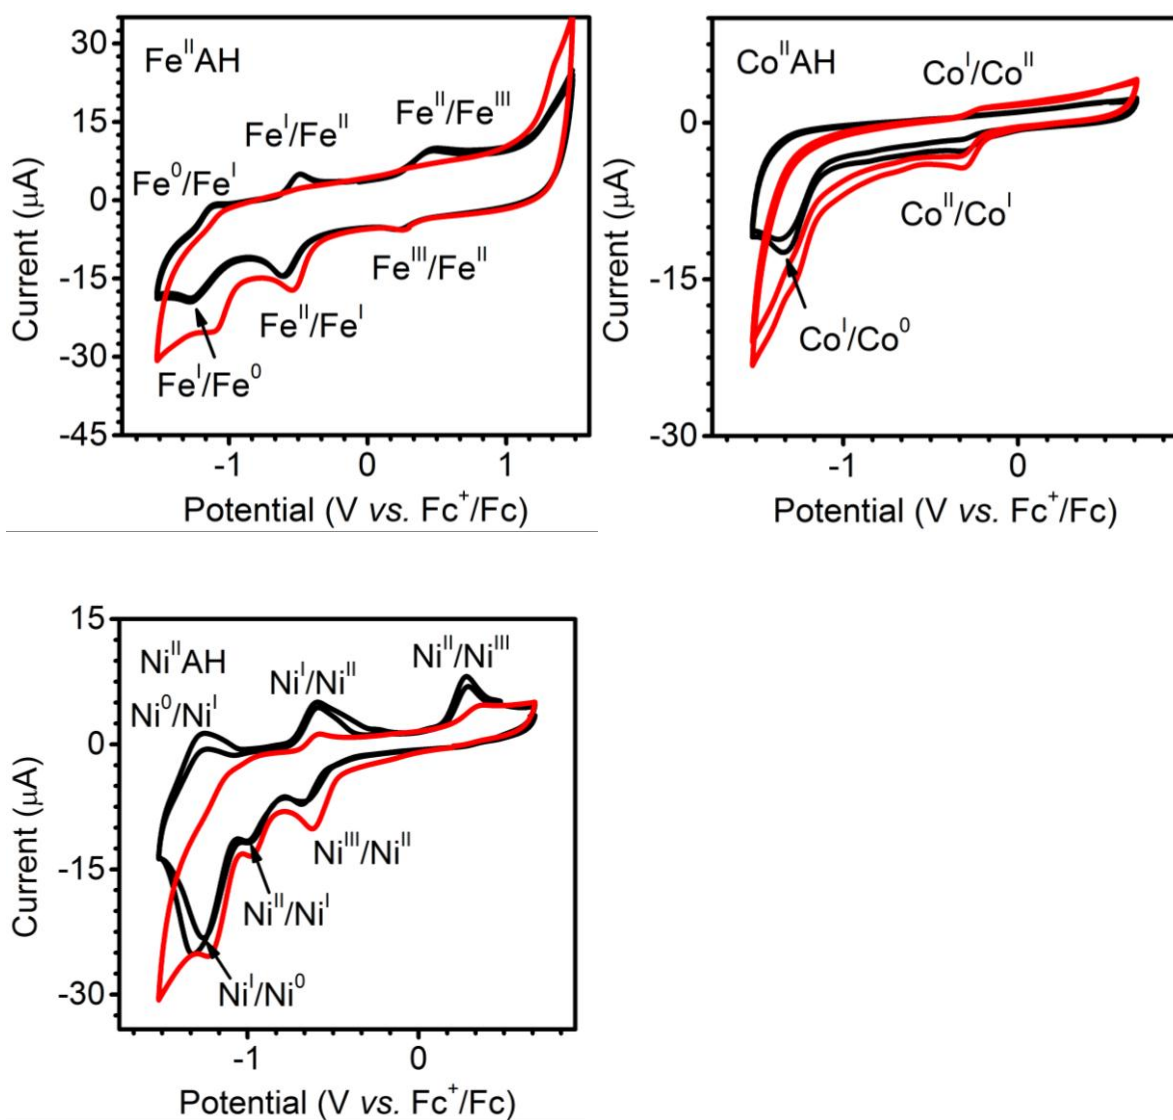

**Figure S2.** CV curves of 1 mM  $\text{Fe}^{\text{II}}\text{AH}$ ,  $\text{Co}^{\text{II}}\text{AH}$  and  $\text{Ni}^{\text{II}}\text{AH}$  under argon (black) and  $\text{CO}_2$  (red) in anhydrous DMF (0.1 M TBATFB) at 100 mV/s.

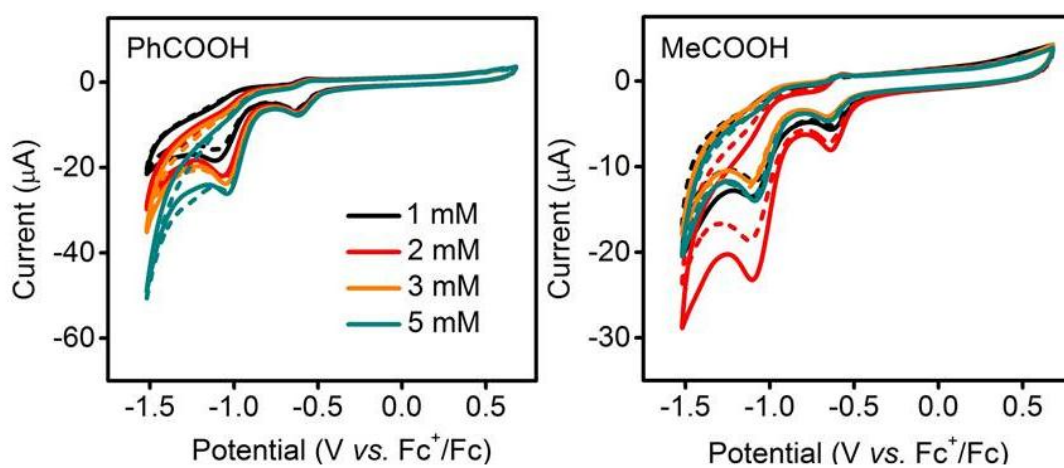

**Figure S3.** Cyclic voltammetry of 1 mM Cu<sup>II</sup>AH under argon (dash) and CO<sub>2</sub> (solid) in anhydrous DMF (0.1 M TBATFB) at 100 mV/s, variations with concentration of added PhCOOH and MeCOOH

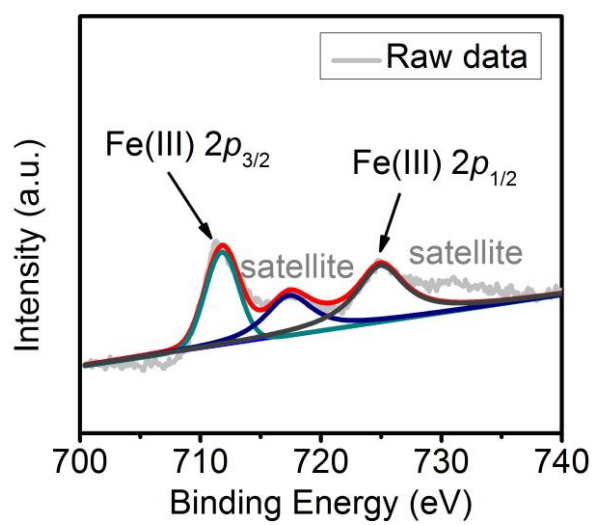

**Figure S4.** XPS spectra of FeTPP\_COOH (Fe<sup>II</sup>AH).

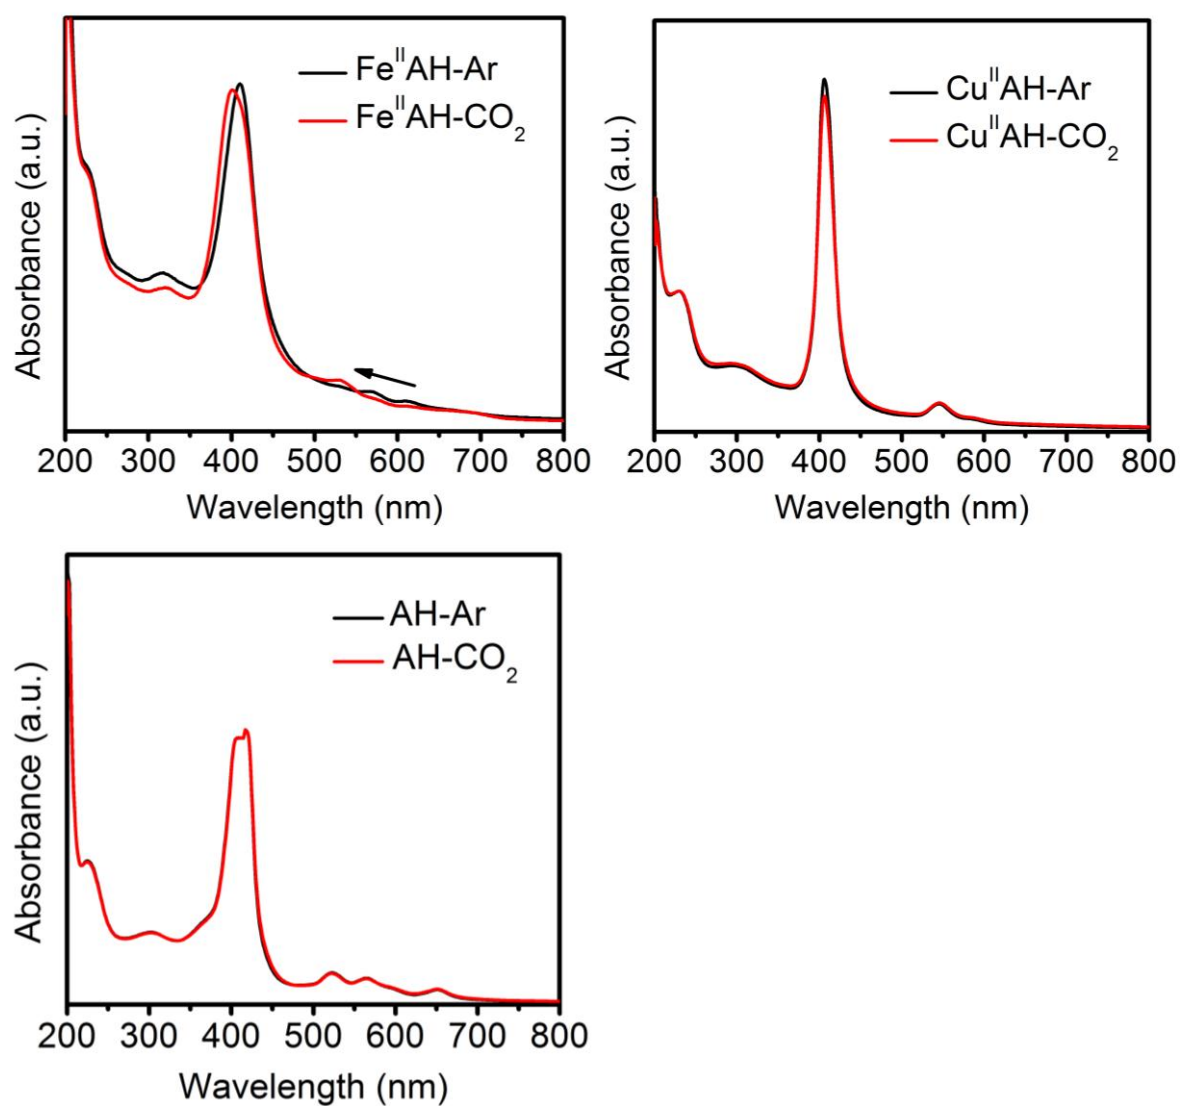

**Figure S5.** UV-Vis spectra of FeTPP\_COOH, CuTPP\_COOH and pure TPP\_COOH ligand under argon and CO<sub>2</sub> in 0.1 M KPi pH=7.



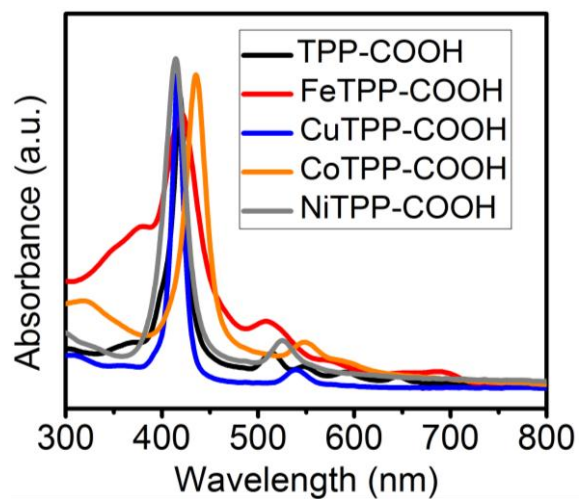

**Figure S6.** UV-Vis spectra of FeTPP-COOH, CuTPP-COOH, CoTPP-COOH, NiTPP-COOH and pure TPP-COOH ligand in DMF.

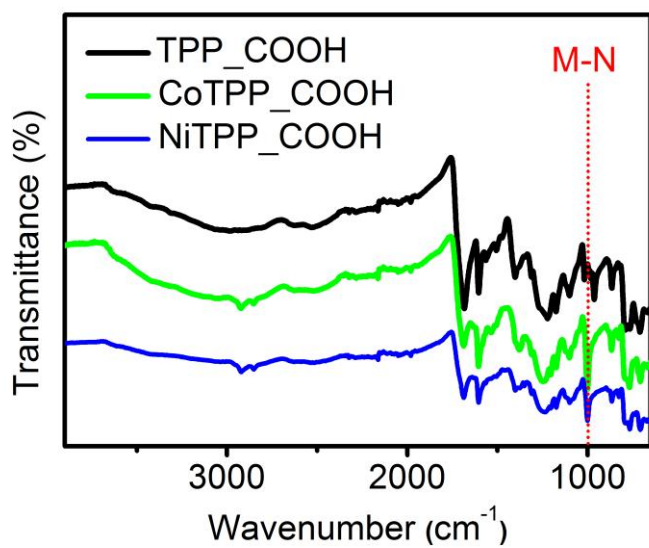

**Figure S7.** ATR-FTIR spectra of CoTPP\_COOH, NiTPP\_COOH and pure TPP\_COOH ligand.

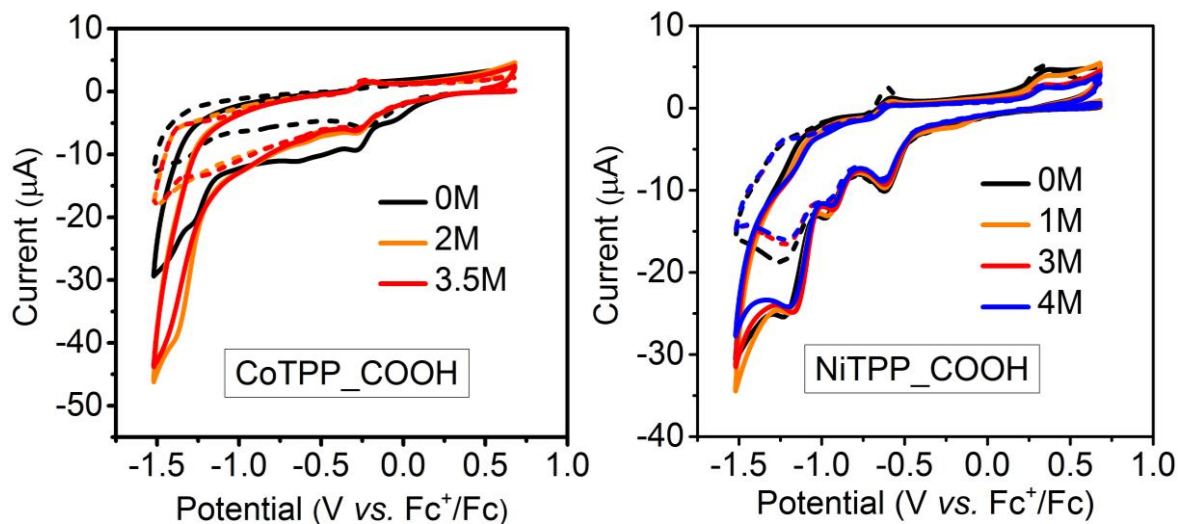

**Figure S8.** Cyclic voltammetry of 1 mM CoTPP-COOH and NiTPP-COOH under argon (dash) and CO<sub>2</sub> (solid) in anhydrous DMF (0.1 M TBATFB) at 100 mV/s, variations with concentration of added H<sub>2</sub>O.

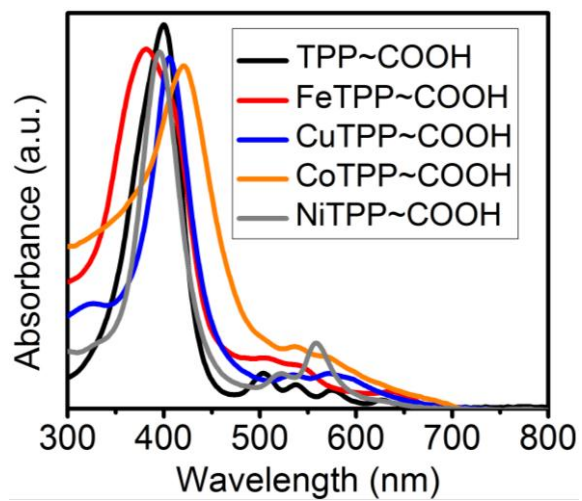

**Figure S9.** UV-Vis spectra of FeTPP~COOH, CuTPP~COOH, CoTPP~COOH, NiTPP~COOH and pure TPP~COOH ligand in DMF.

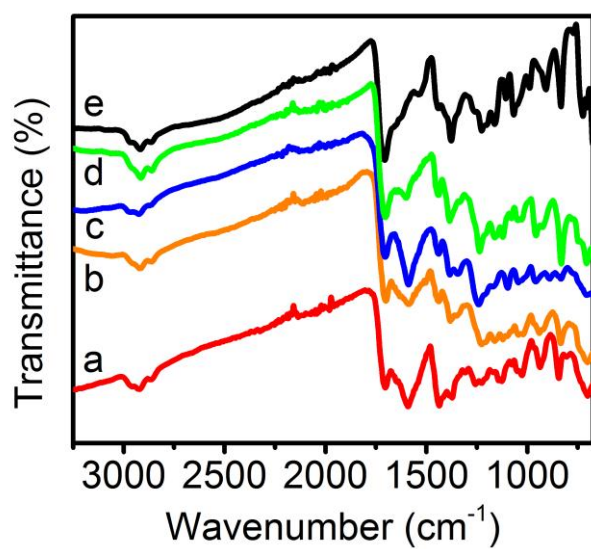

**Figure S10.** ATR-FTIR spectra of a) FeTPP~COOH, b) CuTPP~COOH, c) CoTPP~COOH, d) NiTPP~COOH and e) pure TPP~COOH ligand.

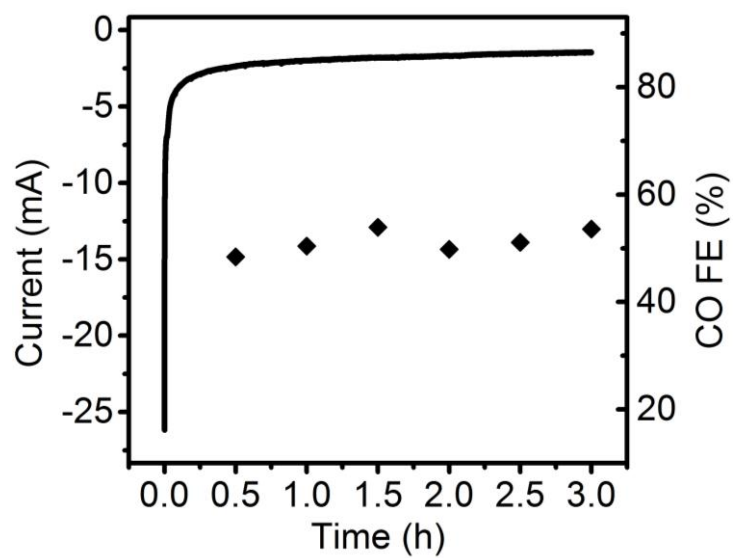

**Figure S11.** The prolonged electrolysis at -1.5 V vs.  $\text{Fc}^+/\text{Fc}$  with  $\text{Fe}^{\text{II}}\sim\text{AH}$ .

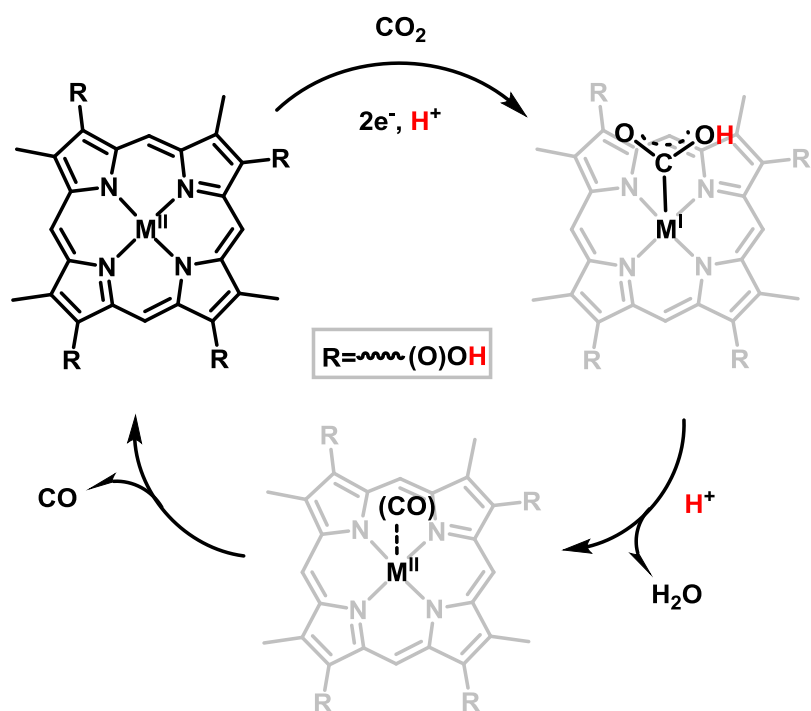

**Figure S12.** The proposed possible mechanism for promoting CO<sub>2</sub> reduction to CO with aliphatic carboxylic acid as local proton source (compound 5).

**Table S1.** Comparison of various metal complexes for electrochemical CO<sub>2</sub> reduction.

| Electrocatalysts                                                                | Onset potential (V)                 | jCO <sub>2</sub> /jH <sub>2</sub>       | FE of CO                                                          | Electrolyte                                              |
|---------------------------------------------------------------------------------|-------------------------------------|-----------------------------------------|-------------------------------------------------------------------|----------------------------------------------------------|
| FeTPP~COOH                                                                      | -1.02 vs. Fc <sup>+</sup> /Fc       | 6.0 at -1.52 V vs. Fc <sup>+</sup> /Fc  | 53% CO at -1.5 V vs. Fc <sup>+</sup> /Fc                          | DMF, <b>this work</b>                                    |
| Compound 1                                                                      | -1.35 V vs. NHE                     | 4.7 at -1.46 V vs. NHE                  | 100% CO at -1.46 V vs. NHE with <b>1 M PhOH</b>                   | DMF+ <b>10mM PhOH</b> <sup>[1]</sup>                     |
| Compound 2                                                                      | -1.2 V vs. NHE                      | 26.5 at -1.33 V vs. NHE                 | 94% CO at -1.16 V vs. NHE                                         | DMF+ <b>2M H<sub>2</sub>O</b> <sup>[2]</sup>             |
|                                                                                 | -1.35 V vs. NHE                     | 5.57 at -1.6 V vs. NHE                  | 100% CO at -1.14 V vs. NHE                                        | DMF+ <b>1M PhOH</b> <sup>[3]</sup>                       |
| Compound 3                                                                      | -1.4 V vs. SCE                      | 4.8 at -2.0 V vs. SCE                   | 70% CO at -1.8 V vs. SCE                                          | Acetonitrile <sup>[4]</sup>                              |
| [Mn(bpy-R)(CO) <sub>3</sub> X]<br>(bpy-R=2,2'-bipyridine; X=Cl, Br)             | -2.8 V vs. Ag/Ag <sup>+</sup>       | 3.0 at -3.0 V vs. Ag/Ag <sup>+</sup>    | N.A.                                                              | Acetonitrile <sup>[5]</sup>                              |
| [Ni(tpy) <sub>2</sub> ] <sup>2+</sup> tpy=terpyridine                           | -1.6 V vs. Fc <sup>+</sup> /Fc      | N.A.                                    | 100% CO at -1.72 V vs. Fc <sup>+</sup> /Fc                        | DMF+ <b>H<sub>2</sub>O(90:10 v:v)</b> <sup>[6]</sup>     |
| Fe-amide-functionalized<br>tetraphenylporphyrin                                 | -2.0~-2.1 V vs. Fc <sup>+</sup> /Fc | 30~85 at -2.2 V vs. Fc <sup>+</sup> /Fc | 74~92% CO at -2.15 V vs. Fc <sup>+</sup> /Fc with <b>1 M PhOH</b> | DMF+ <b>100mM PhOH</b> <sup>[7]</sup>                    |
| ReCl(α-diimine)(CO) <sub>3</sub>                                                | -1.75 V vs. Fc <sup>+</sup> /Fc     | 12 at -2.11 V vs. Fc <sup>+</sup> /Fc   | 70% CO at -2.11 V vs. Fc <sup>+</sup> /Fc                         | Acetonitrile+ <b>0.3M H<sub>2</sub>O</b> <sup>[8]</sup>  |
| [Co <sup>II</sup> (L)](ClO <sub>4</sub> ) <sub>2</sub> L=pentadentate N5 ligand | -1.7 V vs. SCE                      | 3.1 at -2.0 V vs. SCE                   | 75%~80% CO at -1.25 V vs. SCE                                     | DMF <sup>[9]</sup>                                       |
| Re[bpyMe(ImMe)]-<br>(CO) <sub>3</sub> Cl}PF <sub>6</sub>                        | -1.77 V vs. Fc <sup>+</sup> /Fc     | 3.9 at -1.9 V vs. Fc <sup>+</sup> /Fc   | N.A.                                                              | Acetonitrile <sup>[10]</sup>                             |
|                                                                                 | -1.55 V vs. Fc <sup>+</sup> /Fc     | 12 at -1.9 V vs. Fc <sup>+</sup> /Fc    | 60% CO at -1.77 V vs. Fc <sup>+</sup> /Fc                         | Acetonitrile+ <b>2.8M H<sub>2</sub>O</b> <sup>[10]</sup> |
| Co-TPP-NH <sub>2</sub>                                                          | -2.04 V vs. Ag/AgCl                 | N.A.                                    | 0.4% CO, 0.03% MeOH at -2.04 V vs. Ag/AgCl                        | DMF+ <b>5% H<sub>2</sub>O</b> <sup>[11]</sup>            |
| Fe porphyrin-pyridine                                                           | -0.8 V vs. RHE                      | N.A.                                    | 56% CO, 20% CH <sub>4</sub> at -1.4 V vs. RHE                     | DMF <sup>[12]</sup>                                      |
| Fe-TPP-Dimer                                                                    | -0.8 V vs. RHE                      | 10.6 at -1.3 V vs. RHE                  | 48% CO at -1.3 V vs. RHE                                          | DMF <sup>[13]</sup>                                      |
| cobalt meso-tetraphenylporphyrin                                                | -1.85 V vs. SCE                     | 5.2 at -2.05 V vs. SCE                  | 50% CO at -2.05 V vs. SCE                                         | DMF <sup>[14]</sup>                                      |

[1] C. Costentin, S. Drouet, G. Passard, M. Robert and J. M. Saveant, *J. Am. Chem. Soc.*, 2013, **135**, 9023-9031.[2] C. Costentin, S. Drouet, M. Robert and J. M. Saveant, *Science*, 2012, **338**, 90-94.[3] C. Costentin, G. Passard, M. Robert and J.-M. Savant, *PNAS*, 2014, **111**, 14990-14994.[4] F. Franco, C. Cometto, F. F. Vallana, F. Sordello, E. Priola, C. Minero, C. Nervi and R. Gobetto, *Chem. Commun.*, 2014, **50**, 14670-14673.[5] M. Bourrez, F. Molton, S. C. Noblat and A. Deronzier, *Angew. Chem. Int. Ed.*, 2011, **123**, 10077-10080.



- [6] N. Elgrishi, M. B. Chambers, V. Artero and M. Fontecave, *Phys. Chem. Chem. Phys.*, 2014, **16**, 13635-13644.
- [7] E. M. Nichols, J. S. Derrick, S. K. Nistanaki, P. T. Smith and C. J. Chang, *Chem. Sci.*, 2018, **9**, 2952-2960.
- [8] Y. Matsubara, S. E. Hightower, J. Chen, D. C. Grills, D. E. Polyansky, J. T. Muckerman, K. Tanaka and E. Fujita, *Chem. Commun.*, 2014, **50**, 728-730.
- [9] L. J. Chen, Z. G. Guo, X. G. Wei, C. Gallenkamp, J. Bonin, E. Anxolabehere-Mallart, K. C. Lau, T. C. Lau and M. Robert, *J. Am. Chem. Soc.*, 2015, **137**, 10918-10921.
- [10] S. Sung, D. Kumar, M. Gil-Sepulcre and M. Nippe, *J. Am. Chem. Soc.*, 2017, **139**, 13993-13996.
- [11] M. Abdinejad, A. Seifitokaldani, C. Dao, E. H. Sargent, X. A. Zhang and H. B. Kraatz, *ACS Appl. Energy Mater.*, 2019, **2**, 1330-1335.
- [12] M. Abdinejad, C. Dao, B. Deng, F. Dinic, O. Voznyy, X. Zhang and H. B. Kraatz, *ACS Sustain. Chem. Eng.*, 2020, **8**, 9549-9557.
- [13] M. Abdinejad, C. Dao, B. Deng, M. E. Sweeney, F. Dielmann, X. Zhang and H. B. Kraatz, *ChemistrySelect*, 2020, **5**, 979-984.
- [14] X. M. Hu, M. H. Rønne, S. U. Pedersen, T. Skrydstrup and K. Daasbjerg, *Angew. Chem. Int. Ed.*, 2017, **56**, 6468-6472.
